# Supplementary material for: Financial Toxicity in Swiss Cancer Patients Treated with Proton Therapy: An Observational Cross-Sectional Study on Self-Reported Outcome
Source: MDPI journal article supplement (doi:10.3390/cancers15235498), 2023-11-21
Supplement: s1 [file s1]

## Tables

Table S1: Basic questionnaire

|                                                           |                                    |                               |
|-----------------------------------------------------------|------------------------------------|-------------------------------|
| <b>Basic questionnaire (interview)</b>                    |                                    |                               |
| <b>Employment</b>                                         |                                    |                               |
|                                                           | Not gainfully employed             |                               |
|                                                           | Employed                           |                               |
|                                                           | Self -reliant                      |                               |
|                                                           | Unemployed                         |                               |
|                                                           | Recipients due to illness          |                               |
|                                                           | Retired                            |                               |
| <b>Workload before illness</b>                            | 0-100%                             |                               |
| <b>Current workload</b>                                   | 0-100%                             |                               |
| <b>Residing during proton therapy</b>                     |                                    |                               |
|                                                           | Distance from home                 | Km                            |
|                                                           | Living during proton therapy       | At home                       |
|                                                           |                                    | With relatives/friends        |
|                                                           |                                    | In apartment/hotel/guesthouse |
|                                                           |                                    | other                         |
| <b>Reimbursement of housing costs by health insurance</b> |                                    |                               |
|                                                           | Yes                                |                               |
|                                                           | No                                 |                               |
| <b>Transport</b>                                          |                                    |                               |
|                                                           | Daily transport to proton facility |                               |
|                                                           |                                    | Own car                       |
|                                                           |                                    | Rental car                    |
|                                                           |                                    | Public transport              |
|                                                           |                                    | Taxi                          |
|                                                           |                                    | Ambulance                     |
|                                                           |                                    | Other                         |

|                                                                           |                                         |                          |
|---------------------------------------------------------------------------|-----------------------------------------|--------------------------|
| <b>Reimbursement of transport costs by health insurance</b>               |                                         |                          |
|                                                                           | Yes, completely                         |                          |
|                                                                           | Yes, partially                          |                          |
|                                                                           | No                                      |                          |
| <b>Health insurance</b>                                                   |                                         |                          |
|                                                                           | Cost coverage of proton therapy         |                          |
|                                                                           |                                         | Yes, completely          |
|                                                                           |                                         | Yes, partially           |
|                                                                           |                                         | No                       |
|                                                                           | Franchise level                         |                          |
|                                                                           | Amount of own charge for proton therapy |                          |
|                                                                           | Limit of own charge                     |                          |
|                                                                           |                                         | Yes, amount of the limit |
|                                                                           |                                         | No                       |
| <b>Education level (for the caregivers: mother and father separately)</b> |                                         |                          |
|                                                                           | Secondary school                        |                          |
|                                                                           | Vocational training                     |                          |
|                                                                           | High school                             |                          |
|                                                                           | University/applied sciences             |                          |

Table S2: Cost diary

| <b>Medical costs</b>     |                                             | <b>CHF</b> |
|--------------------------|---------------------------------------------|------------|
|                          | Medication                                  |            |
|                          | Stationary stay in hospital                 |            |
|                          | Ambulant medical consultation               |            |
|                          | Ambulant therapy                            |            |
|                          | Nursing aids                                |            |
|                          | Medical services                            |            |
|                          | Other costs                                 |            |
| <b>Non-medical costs</b> |                                             |            |
|                          | Round trips to proton therapy (PT) facility |            |
|                          | Accommodation during PT                     |            |
|                          | External meals due to PT                    |            |
|                          | Phone calls due to PT                       |            |
|                          | Household help due to PT                    |            |
|                          | Leisure activities due to PT                |            |
|                          | Other costs                                 |            |

Table S3: Comprehensive Score for financial Toxicity (COST) – Functional Assessment of Chronic Illness Therapy (FACIT). Items 2, 3, 4, 5, 8, 9, and 10 were reverse scored. The lower the score, the worse the financial toxicity.

|             |                                                                                                       | <b>Not<br/>at all</b> | <b>A<br/>little<br/>bit</b> | <b>Somewhat</b> | <b>Quite<br/>a bit</b> | <b>Very<br/>much</b> |
|-------------|-------------------------------------------------------------------------------------------------------|-----------------------|-----------------------------|-----------------|------------------------|----------------------|
| <b>FT1</b>  | I know that I have enough money in savings, retirement, or assets to cover the costs of my treatment  | 0                     | 1                           | 2               | 3                      | 4                    |
| <b>FT2</b>  | My out-of-pocket medical expenses are more than I thought they would be                               | 0                     | 1                           | 2               | 3                      | 4                    |
| <b>FT3</b>  | I worry about the financial problems I will have in the future as a result of my illness or treatment | 0                     | 1                           | 2               | 3                      | 4                    |
| <b>FT4</b>  | I feel I have no choice about the amount of money I spend on care                                     | 0                     | 1                           | 2               | 3                      | 4                    |
| <b>FT5</b>  | I am frustrated that I cannot work or contribute as much as I usually do                              | 0                     | 1                           | 2               | 3                      | 4                    |
| <b>FT6</b>  | I am satisfied with my current financial situation                                                    | 0                     | 1                           | 2               | 3                      | 4                    |
| <b>FT7</b>  | I am able to meet my monthly expenses                                                                 | 0                     | 1                           | 2               | 3                      | 4                    |
| <b>FT8</b>  | I feel financially stressed                                                                           | 0                     | 1                           | 2               | 3                      | 4                    |
| <b>FT9</b>  | I am concerned about keeping my job and income, including work at home                                | 0                     | 1                           | 2               | 3                      | 4                    |
| <b>FT10</b> | My cancer or treatment has reduced my satisfaction with my present financial situation                | 0                     | 1                           | 2               | 3                      | 4                    |
| <b>FT11</b> | I feel in control of my financial situation                                                           | 0                     | 1                           | 2               | 3                      | 4                    |
| <b>FT12</b> | My illness has been a financial hardship to my family and me                                          | 0                     | 1                           | 2               | 3                      | 4                    |

Table S4: Questionnaire for Coping Strategies

|                                                                                         |     |    |
|-----------------------------------------------------------------------------------------|-----|----|
| I/we have to reduce our expenses for leisure activities (e.g. vacation, external meals) | Yes | No |
| I/we have to reduce our expenses for livelihood (e.g. food, clothing)                   |     |    |
| I/we have to spend our savings or parts of them                                         |     |    |
| I/we have to borrow money                                                               |     |    |
| I/we have to sell our property or parts of it                                           |     |    |
| My partner or I have to work more                                                       |     |    |
| Other                                                                                   |     |    |

Table S5

Linear regression analysis of the COST score of the whole cohort (n=146), including the site of treatment, concomitant chemotherapy and treatment duration as explanatory variables.

|                                     |                  | Estimate | Lower 95% CI | Upper 95% CI | p-Value  |
|-------------------------------------|------------------|----------|--------------|--------------|----------|
| Intercept                           |                  | 30.29    | 21.31        | 39.27        | < 0.0001 |
| Site of treatment extracranial      |                  |          |              |              |          |
|                                     | Brain/Skull base | 2.16     | -1.97        | 6.25         | 0.30     |
|                                     | Head and Neck    | 1.66     | -4.11        | 7.42         | 0.57     |
| Concomitant Chemotherapy yes vs. no |                  | -0.32    | -4.65        | 4.01         | 0.88     |
| Treatment duration (days)           |                  | -0.08    | -0.29        | 0.12         | 0.42     |
